# Supplementary material
Source: publisher figshare collection journal article supplement (https://karger.figshare.com/articles/dataset/_/24145116)
Supplement: Supplementary file 1 [file 1]

| Primer name | Primer sequence （5，-3，） |
| --- | --- |
| M-GAPDH-S | CCTCGTCCCGTAGACAAAATG |
| M-GAPDH-A | TGAGGTCAATGAAGGGGTCGT |
| M-CPT1A-S | GCCTCTATGTGGTGTCCAAGTATC |
| M-CPT1A-A | CACCATAGCCGTCATCAGCAA |
| M-ACOT1-S | AGCAGCAGGGCATTACATCG |
| M-ACOT1-A | TTCCCCAACCTCCAAACCATC |
| M-Acox2-S | TCTCCCTCAGTCCGTCATGT |
| M-Acox2-A | TACTGGTCAACCCCGGATCT |
| M-Cd36-S | GGAACTGTGGGCTCATTGCT |
| M-Cd36-A | CAACTTCCCTTTTGATTGTCTTCTC |

Table S1 Primer Information

**Fig. S1.** PA-induced up-regulation of lipid metabolism genes in C2C12 cells.

C2C12 cells were treated with 0.5mM PA. **a** KEGG Pathway Classification (PA vs Control) showed that lipid metabolism genes were upregulated in PA-induced C2C12 cells.

**Fig. S2.** After irisin intervention, PA-induced up-regulation of lipid metabolism genes in C2C12 cells was inhibited.

C2C12 cells were treated with 0.5 mM PA in the presence or absence of 100 ng/ml Irisin. **a** Irisin+PA vs PA (Down): KEGG Pathway Classification showed downregulation of lipid metabolism genes.

**Fig. S3.** Irisin inhibits PA-induced up-regulation of lipid metabolism genes in C2C12 cells.

C2C12 cells were treated with 0.5 mM PA in the presence or absence of 100 ng/ml Irisin. **a-d** Fatty acid oxidation genes(CPT1A, ACOT1, ACOX2 and CD36) were analyzed by RT-qPCR..**P* < 0.05, ***P*< 0.01,****P* < 0.001 vs. the control group; #*P*<0.05,*##P*< 0.01, ###*P*< 0.001 vs. the PA group; and ns not signiﬁcant.

**Fig. S4.** Changes of serum Irisin and FFA in each group.

**a** Serum Irisin levels were evaluated by ELISA. **b** Serum free fatty acid(FFA) levels were evaluated by colorimetry.**P* < 0.05, ***P*< 0.01,****P* < 0.001 vs. the control group; #*P*<0.05,*##P*< 0.01, ###*P*< 0.001 vs. the CKD group; and ns not signiﬁcant.
